# Supplementary material for: Reactivity of Myoglobin Reconstituted with Cobalt Corrole toward Hydrogen Peroxide
Source: Int J Mol Sci. 2022 Apr 27;23(9):4829. doi: 10.3390/ijms23094829 (PMC9104730; doi:10.3390/ijms23094829)
Supplement: Supplementary file 1 [file ijms-23-04829-s001.zip › ijms-1695263-supplementary.pdf]

# Reactivity of myoglobin reconstituted with cobalt corrole toward hydrogen peroxide

Koji Oohora,\*Takahiro Tomoda, and Takashi Hayashi\*

## ELECTRONIC SUPPLEMENTARY INFORMATION

### Table of contents:

1. Figure S1. Transient absorption changes of rMb(Co<sup>III</sup>Cor) upon addition of various concentration of H<sub>2</sub>O<sub>2</sub> in the presence of 10 mM guaiacol.
2. Figure S2. Transient absorption changes of rMb(Co<sup>III</sup>Cor) upon addition of 5 mM H<sub>2</sub>O<sub>2</sub> in the presence of various concentration of guaiacol.

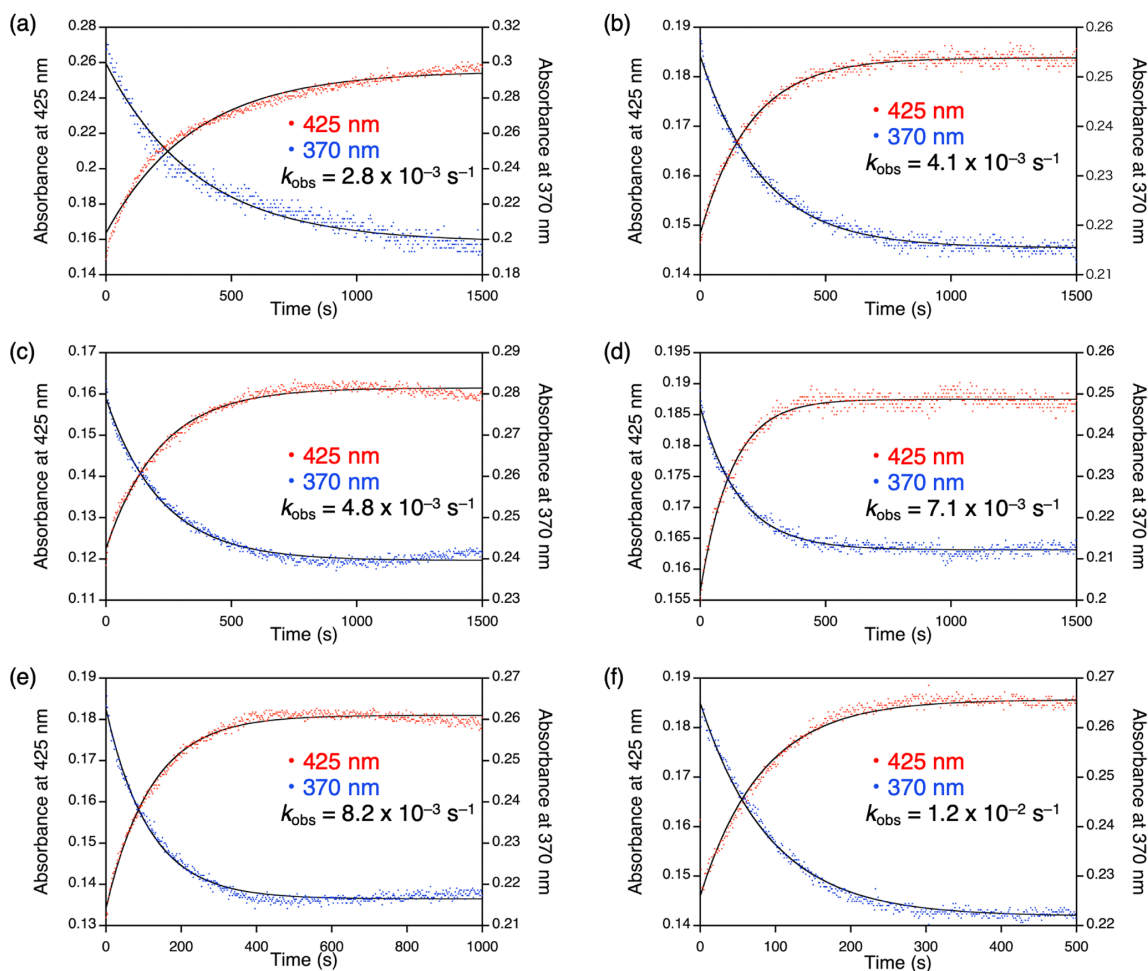

**Figure S1:** Transient absorption changes of rMb(Co<sup>III</sup>)Cor upon addition of various concentration of H<sub>2</sub>O<sub>2</sub> in the presence of 10 mM guaiacol. The solid lines show fitting curves by an equation of  $Abs(t) = Abs_{\infty} + Abs_0 \times \exp(-k_{\text{obs}} \times t)$ , where  $Abs_{\infty}$  and  $Abs_0$  are absorbances at  $t = \infty$  and  $t = 0$ , respectively. Conditions: [rMb(Co<sup>III</sup>)Cor] = 8  $\mu$ M; [H<sub>2</sub>O<sub>2</sub>] = 2 mM (a), 3 mM (b), 4 mM (c), 5 mM (d), 6 mM (e), or 7 mM (f); [guaiacol] = 10 mM in 100 mM potassium phosphate buffer (pH 7.0) at 25  $^{\circ}$ C.

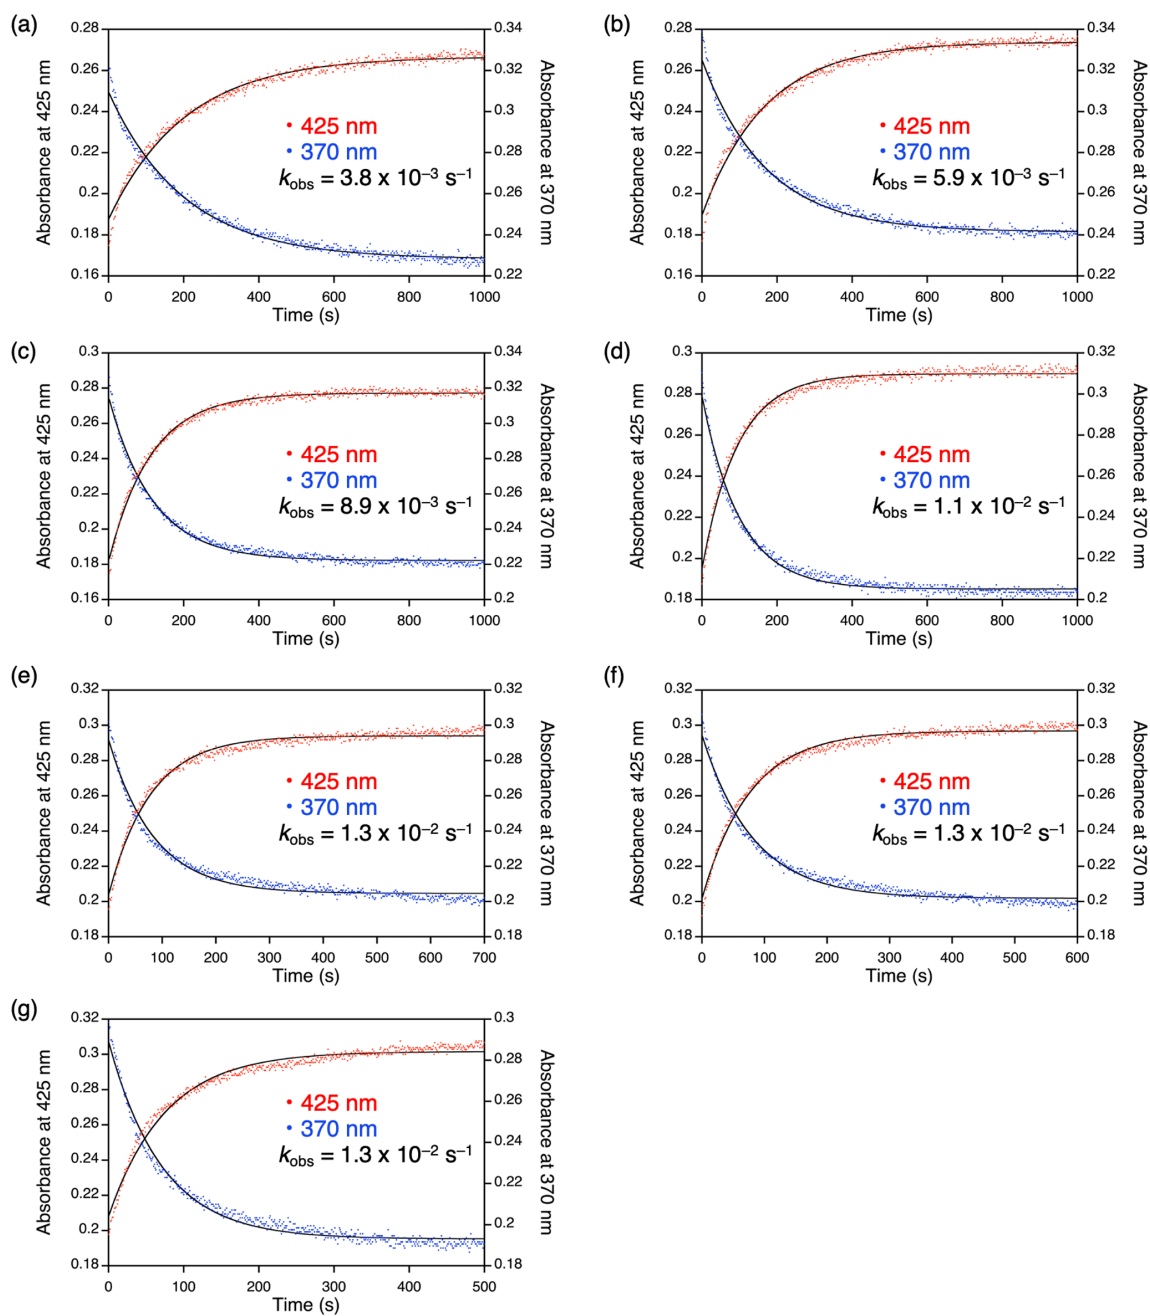

**Figure S2.** Transient absorption changes of rMb(Co<sup>III</sup>Cor) upon addition of 5 mM H<sub>2</sub>O<sub>2</sub> in the presence of various concentration of guaiacol. The solid lines show fitting curves by an equation of  $Abs(t) = Abs_{\infty} + Abs_0 \times \exp(-k_{obs} \times t)$ , where  $Abs_{\infty}$  and  $Abs_0$  are absorbances at  $t = \infty$  and  $t = 0$ , respectively. Conditions: [rMb(Co<sup>III</sup>Cor)] = 8  $\mu$ M; [H<sub>2</sub>O<sub>2</sub>] = 5 mM; [guaiacol] = 0.05 mM (a), 0.1 mM (b), 0.5 mM (c), 1.0 mM (d), 2.5 mM (e), 5.0 mM (f), or 7.5 mM (g) in 100 mM potassium phosphate buffer (pH 7.0) at 25  $^{\circ}$ C.
